# Supplementary material for: Investigation of the summer 2018 European ozone air pollution episodes using novel satellite data and modelling
Source: Copernicus journal article supplement (doi:10.5194/acp-2022-827), 2023-01-19
Supplement: Supplementary file 1 [file acp-2022-827-supplement.pdf]

**Supplementary Material for “Investigation of the summer 2018 European ozone air pollution episodes using novel satellite data and modelling”**

Richard J. Pope<sup>1,2</sup>, Brian J. Kerridge<sup>3,4</sup>, Martyn P. Chipperfield<sup>1,2</sup>, Richard Siddans<sup>3,4</sup>, Barry G. Latter<sup>3,4</sup>, Lucy J. Ventress<sup>3,4</sup>, Matilda A. Pimlott<sup>1</sup>, Wuhu Feng<sup>1,5</sup>, Edward Comyn-Platt<sup>6</sup>, Gary D. Hayman<sup>7</sup>, Stephen R. Arnold<sup>1</sup> and Ailish M. Graham<sup>1</sup>

**Supplementary Material (SM) 1 – Ozone Precursor Gases**

The enhancements in tropospheric ozone ( $O_3$ ) in the summer of 2018 across Europe, as presented in the main manuscript, are likely to be driven by a combination of factors because tropospheric  $O_3$  distributions are influenced by precursor emissions, meteorological conditions, deposition, stratospheric intrusion and atmospheric chemistry. Therefore, we explore how several precursor gases methanol ( $CH_3OH$ ), nitrogen dioxide ( $NO_2$ ) and carbon monoxide ( $CO$ ), which also can be observed by satellite, compare between the summers of 2017 and 2018. **Figure S1** compares total column  $CH_3OH$  ( $TCCH_3OH$ ) amounts for May to August in 2017 and 2018 retrieved by RAL's extended Infrared and Microwave Sounding (IMS) scheme applied to MetOp-A data from IASI, MHS and AMSU. In 2017, the peak column values occur in July ( $10.0\text{--}15.0 \times 10^{15}$  molecules/ $cm^2$  over land and  $0.0\text{--}5.0 \times 10^{15}$  molecules/ $cm^2$  over the sea) and are minimum in May ( $5.0\text{--}10.0 \times 10^{15}$  molecules/ $cm^2$  over land and  $0.0\text{--}2.0 \times 10^{15}$  molecules/ $cm^2$  over the sea). Note, the IMS scheme can exhibit a negative bias in background regions where  $CH_3OH$  concentrations are particularly low and below the detection limit of IASI, as shown by Pope et al., (2021). This bias has not been corrected for here. In 2018,  $TCCH_3OH$  values are larger than in 2017 and peak in July at  $12.0\text{--}15.0 \times 10^{15}$  molecules/ $cm^2$  over land and  $3.0\text{--}8.0 \times 10^{15}$  molecules/ $cm^2$  over the sea) and are minimum in May at  $5.0\text{--}10.0 \times 10^{15}$  molecules/ $cm^2$  over land and  $1.0\text{--}5.0 \times 10^{15}$  molecules/ $cm^2$  over the sea. The  $TCCH_3OH$  differences (**Figure S1 RHS**) between the two years are positive over extensive areas, peaking at  $5.0\text{--}10.0 \times 10^{15}$  molecules/ $cm^2$  in May over northern Europe and Scandinavia, which correlates strongly with IMS co-retrieved surface temperature differences (**Figure 1** in the main manuscript). Throughout June to August, the enhancements are lower between  $2.0\text{--}5.0 \times 10^{15}$  molecules/ $cm^2$  across continental Europe.

Investigation of GOME-2 tropospheric column  $NO_2$  ( $TCNO_2$  – near-real-time level-2 product obtained from EUMETSAT at [https://acsaf.org/nrt\\_access.php](https://acsaf.org/nrt_access.php)), **Figure S2**, shows peak values over source regions of  $5.0\text{--}10.0 \times 10^{15}$  molecules/ $cm^2$ , which is consistent in most months and years. Background  $TCNO_2$  ranges between  $0.0$  and  $2.0 \times 10^{15}$  molecules/ $cm^2$ . Between 2017 and 2018, there are enhancements over extensive areas;  $1.0\text{--}3.0 \times 10^{15}$  molecules/ $cm^2$  in May and July over central Europe. Total column  $CO$  ( $TCCO$ ) retrieved by IMS (**Figure S3**) peaks in May ranging between  $57.0\text{--}63.0$  DU over the ocean and typically  $55.0\text{--}60.0$  DU over continental Europe. In June and July, there is a decrease in  $TCCO$  with values ranging between  $52.0$  DU and  $57.0$  DU over the ocean and  $50.0$  DU to  $55.0$  DU over land. In August, there is an increase in  $TCCO$  with ocean values between  $58.0$  DU to  $62.0$  DU in 2017 and a peak to  $65.0$  DU in 2018. Over continental Europe,  $TCCO$  ranges between  $45.0$  DU and  $60.0$  in 2017 and  $50.0$  to  $63.0$  DU in 2018. In May and June, the difference panels (**RHS of Figure S3**) show broad enhancements to  $TCCO$  in 2018 of  $2.0$  to  $6.0$  DU. In July, there is little difference between 2017 and 2018, while in August the largest 2018  $TCCO$  enhancements are observed between  $2.0$  DU to  $7.0$  DU over most of continental Europe but with peak values (approximately  $7.0\text{--}8.0$  DU) over the central Mediterranean.

To summarize, examination of several ozone precursors which were retrieved together with ozone from Metop-A measurements all show enhancements over Europe in the summer of 2018 compared to 2017. CH<sub>3</sub>OH is directly influenced by the observed surface temperature enhancements correlated with biogenic activity and emissions. NO<sub>2</sub> enhancements are generally small in scale with the largest contained to central Europe in May and July, while CO appears to be broadly enhanced across the domain in most of the summer months. While there is observational evidence of enhancements to precursor gases, and hence potentially O<sub>3</sub>, we need to use a detailed atmospheric chemistry transport model (TOMCAT in this study) to investigate the scale of the O<sub>3</sub> enhancements and the processes involved.

## SM 2 – Total Column Ozone

The differences in total column O<sub>3</sub> (TCO<sub>3</sub>) between 2017 and 2018 for GOME-2 and IMS retrievals are shown in **Figures S4** and **S5**, respectively, and are consistent. In June, July and August, both instruments show positive differences of approximately 5.0-20.0 DU across continental Europe. In July and August (and June to a lesser extent), there are negative differences (-30.0 to -10.0 DU) across the UK, North Sea and Scandinavia. In May, there appears to be an East-West positive-negative dipole in TCO<sub>3</sub> across Europe. Several of the spatial features in the TCO<sub>3</sub> 2018-2017 difference plots are consistent with the differences in SCO<sub>3</sub> (i.e. **Figures 3** and **4** in the main manuscript). For instance, in June (May), there are negative (positive) TCO<sub>3</sub> differences of <-30.0 DU (>50.0 DU) between the UK and Iceland with corresponding negative (positive) SCO<sub>3</sub> differences of -5.0 to 0.0 DU (2.0-5.0 DU). For GOME-2, the SCO<sub>3</sub> and TCO<sub>3</sub> spatial differences are positively correlated with values in May, June, July and August of 0.56, 0.59, 0.58 and 0.57, respectively. For IMS, the corresponding correlations in May, June, July and August were 0.60, 0.65, 0.29 and 0.54.

## SM 3 – TOMCAT Biogenic Emissions

As shown by IMS retrieved surface temperature data (**Figure 1** of the main manuscript), there were substantial enhancements in May and July between 2017 and 2018 (i.e. enhancements of 3.0-8.0 K over central continental Europe and >10.0 K over Scandinavia). Higher surface temperature can increase emissions of precursor biogenic gases. Higher air temperatures can also promote chemical formation of O<sub>3</sub> and summer-time heat-waves are often associated with blocking events leading to atmospheric stability favourable for O<sub>3</sub> formation e.g. Pope et al., (2016). The latter two are accounted for automatically in TOMCAT given its detailed tropospheric chemistry scheme and prescribed reanalysis meteorological fields. However, the increase in biogenic emissions resulting from surface temperature enhancements is not represented in the standard climatological biogenic volatile organic (BVOC) emissions from the Chemistry-Climate Model Initiative (CCMI) used in TOMCAT (see Pope et al., (2020)). Therefore, we have used BVOC emissions for acetone, methanol, isoprene and monoterpenes from Jules (the Joint UK Land Environment Simulator) land surface model (Pacifico et al., 2011; Best et al., 2011; Clark et al., 2011) provided by the Centre for Ecology and Hydrology (CEH). Jules meteorological inputs came from ECMWF ERA-Interim, as for TOMCAT, the model setup used 9 plant function types and was driven by the TRIFFID global vegetation model (Zhang et al., 2015). However, the other BVOC emissions (e.g. formaldehyde, HCHO) came from CCMI as used in Pope et al., (2020).

**Figure S6** shows the combined TOMCAT input emissions (in µg/m<sup>2</sup>/s of C) from Jules for acetone, methanol, isoprene and monoterpenes in 2017 and 2018. In 2017, between May and August, the peak emissions are over central and eastern Europe ranging between approximately 0.35 and >0.5

$\mu\text{g}/\text{m}^2/\text{s}$ . Over Scandinavia, the BVOC emissions peak in July between approximately 0.3 and 0.4  $\mu\text{g}/\text{m}^2/\text{s}$ . Between 2017 and 2018, the BVOC emissions have similar rates except for Scandinavia where the emissions are  $>0.4 \mu\text{g}/\text{m}^2/\text{s}$  over a larger area. The difference panels (**Figure S6 RHS**) show that broadly across Europe between May and August, the BVOC emissions are larger by 0.0-0.1  $\mu\text{g}/\text{m}^2/\text{s}$  in 2018. In June, around the Alps and parts of eastern Europe, there are negative differences of -0.1  $\mu\text{g}/\text{m}^2/\text{s}$  to -0.05  $\mu\text{g}/\text{m}^2/\text{s}$  due to larger 2017 BVOC emissions. The largest differences therefore are over Scandinavia, especially May and July (and June to lesser extent), where the BVOC emissions are larger by 0.2  $\mu\text{g}/\text{m}^2/\text{s}$  to  $>0.25 \mu\text{g}/\text{m}^2/\text{s}$ . This matches the spatial pattern in inter-year differences in  $\text{TCCH}_3\text{OH}$  (**Figure S1**) retrieved by IMS providing confidence in the spatial distribution of the BVOC emissions.

It should be noted though that the annual global emission total for Jules was lower than expected (i.e. 284.0 Tg of C in 2017) when compared with CCMI isoprene emissions (461.0 Tg of C). Therefore, we decided to scale up Jules isoprene emissions in 2017 and 2018 by the same factor. As we were interested in Europe, a relatively small area of the globe, we performed the scaling in  $60^\circ$  longitude and latitude bins to retain more accurate regional budgets than just scaling everything uniformly globally. For consistency, though the annual totals were more comparable for the other species, the same methodology was applied to acetone, methanol and monoterpenes as well.

#### **SM 4 – TOMCAT Evaluation**

To evaluate the ability of TOMCAT to simulate the observed tropospheric  $\text{O}_3$  behaviour, we used the GOME-2 and IMS satellite datasets and the EMEP surface sites. **Figure S7a & b** shows that over Europe, TOMCAT is able to reproduce the broad surface  $\text{O}_3$  enhancement seen in May-June-July-August (MJJA) 2018 when compared with 2017. The EMEP sites show positive differences between 2.0 ppbv and  $>10.0$  ppbv across Europe, peaking over central Europe with the smallest enhancements at the higher European latitudes (e.g. Scotland & Scandinavia). In comparison, TOMCAT is able to simulate the spatial pattern of the MJJA 2018 surface  $\text{O}_3$  enhancement, but the magnitude of the difference is smaller between 1.0 ppbv and 5.0 ppbv. Over eastern Europe though, TOMCAT simulates near-zero differences whereas EMEP shows enhancements between 2.0 ppbv and 5.0 ppbv. The modelled enhancements are potentially lower than that in EMEP due, in part, to the moderate overestimation of TOMCAT surface ozone in July and August in 2017. A similar relationship is found between TOMCAT and the satellite observations, discussed later. In terms of the absolute magnitude, TOMCAT does a reasonable job reproducing the seasonal cycle and monthly mean surface  $\text{O}_3$  values over Europe in 2017 and 2018 (i.e. TOMCAT grid boxes are co-located to EMEP sites and then used to derive the seasonal cycles). In 2017, EMEP surface  $\text{O}_3$  peaks at approximately 36.0-38.0 ppbv in April and May. However, TOMCAT, while simulating similar peak values, peaks several months later in May/June, and the subsequent drop off in values is less pronounced in the observations. In all months, except for December 2017, TOMCAT and EMEP monthly ranges (mean  $\pm$  standard deviation) overlap showing that the model can simulate surface  $\text{O}_3$  values observed by EMEP. Overall, the two seasonal cycles are reasonably well correlated (0.73) and the mean bias is low (-0.63 ppbv) and sits within the observational error (i.e. standard error with the autocorrelation accounted for of 3.9 ppbv). The RMSE is 4.1 ppbv and sits just outside the uncertainty range. In 2018, the model simulations only go until September and in the summer the model captures the absolute values and evolution of the observational seasonal cycle. However, in the winter and spring months, the model underestimates by 5.0-10.0 ppbv (similar in 2017 but lower differences of 0.0-5.0 ppbv). The correlation is 0.86 and both the mean bias and RMSE sit within the

observational uncertainty. Therefore, TOMCAT simulates the absolute values and seasonality of the surface observations reasonably well and, although simulating smaller absolute 2018 enhancement, successfully captures the spatial distribution.

There is good consistency between GOME-2 (**Figure S8**) and IMS retrieved  $\text{SCO}_3$  (**Figure S10**), both showing substantial  $\text{SCO}_3$  enhancements (4.0-8.0 DU for GOME-2 and 3.0-6.0 DU for IMS) in May and July over continental Europe. In June and August, both GOME-2 and IASI show smaller scale  $\text{SCO}_3$  enhancements of 1.0-3.5 DU across Europe. In April and May, both instruments show enhancements over the North Atlantic (3.0-9.0 DU). The spatial correlation between instruments over Europe (i.e. domain in **Figures S8-11**) ranges between 0.21 and 0.47 for the monthly differences. Therefore, considering that the GOME-2 and IASI retrievals use ultraviolet (UV) and infrared (IR) wavelengths, respectively, with peak vertical sensitivities in the lower and mid/upper troposphere, consistency in the magnitudes and patterns of the 2018-2017 enhancements in retrieved  $\text{SCO}_3$  indicates these to extend over the bulk of the troposphere. It also provides confidence in these satellite observations to detect regional tropospheric spatiotemporal variability. To evaluate TOMCAT and assess its ability to simulate enhancements in  $\text{SCO}_3$  in comparison to GOME-2 and IASI, the satellite averaging kernels (AKs) (i.e. the satellite vertical smearing) need to be applied to TOMCAT to allow for like-for-like comparisons. The GOME-2 (**Equation S1**) and IASI (**Equation S2**) AKs are applied as:

$$\text{TOMCAT}_{AK} = \text{AK} \cdot \text{TOMCAT}_{int} + \text{imak\_sc\_apr} \quad (\text{S1})$$

$$\text{TOMCAT}_{AK} = \text{AK} \cdot (\text{TOMCAT}_{int} - \text{apr}) + \text{apr} \quad (\text{S2})$$

where  $\text{TOMCAT}_{AK}$  is the modified model sub-column profile (DU),  $\text{AK}$  is the averaging kernel matrix,  $\text{TOMCAT}_{int}$  is the TOMCAT sub-column profile (DU) on the satellite pressure grid and  $\text{apr}$  is the apriori (DU) and  $\text{imak\_sc\_apr}$  represents the term  $(I - \text{AK}) \cdot \text{apr}$  where  $I$  is the identity matrix.

For TOMCAT with GOME-2 or IMS AKs applied in **Figures S9** and **S11**, positive  $\text{SCO}_3$  differences occur primarily in May and July (1.0-3.0 DU) over continental Europe, similarly to the respective retrievals. In June and August, again like the respective retrievals, the  $\text{SCO}_3$  enhancements over Europe are widespread but weaker between 0.0 to 2.0 DU (though more noticeable in  $\text{TOMCAT\_IASI\_AK}$ ). Also, in April and May, both TOMCAT data sets show  $\text{SCO}_3$  enhancements over the North Atlantic (0.0-2.0 DU for  $\text{TOMCAT\_G2\_AK}$  and 1.0-3.0 DU for  $\text{TOMCAT\_IASI\_AK}$ ). There are a few observed instances of negative difference (e.g. -2.0 to 0.0 DU) over central Europe in September and the mid-North Atlantic in May and June. However, the TOMCAT signal tends to be weaker. In terms of spatial patterns in the  $\text{SCO}_3$  difference between 2017 and 2018, correlations between  $\text{TOMCAT\_G2\_AK}$  and GOME-2 range between 0.33 and 0.54 over Europe for monthly data and 0.47 for a six monthly average. For  $\text{TOMCAT\_IASI\_AK}$  and IASI, they range between 0.39 and 0.63 for monthly data and 0.53 for a six monthly average.

In summary, TOMCAT is able to reproduce the sign and spatial distribution of the 2018-2017  $\text{O}_3$  differences in the surface and satellite observations. Through the summer months of 2018, TOMCAT, like the observations, shows there are enhancements in surface/lower tropospheric  $\text{O}_3$  in 2018, but the absolute magnitude tends to be larger in the observational datasets. Therefore, we consider the TOMCAT model to be a suitable tool to diagnose the drivers of the European summer 2018 lower tropospheric  $\text{O}_3$  enhancements.

## SM 5 – ROTRAJ Back-trajectories

Advection of tropospheric O<sub>3</sub>-rich air masses into Europe potentially contributed towards the observed enhancements in the summer of 2018. To investigate this we have utilised back-trajectories from the Reading Offline Trajectory Model (ROTRAJ), a Lagrangian atmospheric transport model (Methven *et al.*, 2003), to quantify the import of O<sub>3</sub> into the domain. ROTRAJ was initialised over Paris and Berlin (two central locations within the domain) and back-trajectories released for 10 days in 6 hour intervals (i.e. 41 points, including release point). A back-trajectory was released every 6 hours throughout May to August in 2017 and 2018 (i.e. 492 back-trajectories in total) with output at 00 UTC, 06 UTC, 12 UTC and 18 UTC. As we investigate modelled O<sub>3</sub> at the surface and at 500 hPa, the back-trajectories were released at these two altitudes. In total, ROTRAJ was run 8 times (i.e. 2 years x 2 locations x 2 altitudes). To determine the level of O<sub>3</sub> being transported into the domain, each trajectory point in the trajectory path was co-located with TOMCAT O<sub>3</sub> data (i.e. the closest grid box, altitude level and model 6-hourly time step) and the trajectory O<sub>3</sub> average determined (i.e. back-trajectories from O<sub>3</sub>-rich air masses will be larger). These O<sub>3</sub>-weighted back-trajectories (O<sub>3</sub>WBT) for Paris and Berlin (May-August 2017 & 2018) at the surface and 500 hPa have been plotted in **Figures SM12** and **13**. However, as the O<sub>3</sub>WBT are subject to large scale variability, they have been averaged them onto the TOMCAT horizontal spatial resolution in the corresponding panels in **Figures SM14** and **15**.

When initialised at the surface in Paris (**Figure SM14a & b**) the O<sub>3</sub>WBT range from 40.0 ppbv to >50.0 ppbv over continental Europe in both years, but 40.0-45.0 ppbv and 33.0-40.0 ppbv over the North Atlantic in 2017 and 2018, respectively. A similar spatial pattern occurs when initialised at the surface over Berlin (**Figure SM15a & b**) where continental Europe has O<sub>3</sub>WBT values of 40.0-50.0 ppbv in both years (though approximately 30.0 ppbv over Scandinavia in 2017). Over the North Atlantic, this ranges from 40.0-45.0 ppbv and 35.0-42.0 ppbv in 2017 and 2018, respectively. This appears to suggest that in 2017, the import of O<sub>3</sub>-rich air masses into Europe was larger than that of 2018. Therefore, the surface enhancements in O<sub>3</sub> in the summer of 2018 were predominantly not from advected O<sub>3</sub> into the domain.

At approximately 500 hPa, a different relationship exists. As the back-trajectories are initialised at a higher altitude, with larger horizontal wind velocities (i.e. the free troposphere), they originate from distances further away than those at the surface. When initialised over Paris at approximately 500 hPa (**Figure SM14c & d**), the O<sub>3</sub>WBT values are more spatially uniform, increasing in value towards the Arctic. Below and above 50°N, the O<sub>3</sub>WBT values range from 45.0-60.0 ppbv and from 50.0-80.0 ppbv, respectively, in 2017. For 2018, a similar spatial pattern occurs but with larger O<sub>3</sub>WBT values over the southern North Atlantic of 55.0-65.0 ppbv. For Berlin at approximately 500 hPa (**Figure SM15c & d**), the same large scale signal exists with similar absolute O<sub>3</sub>WBT values. Therefore, there appears to be transport of O<sub>3</sub>-rich air in 2018 (typically 3.0-7.0 ppbv larger than in 2017) from the southern North Atlantic to the 500 hPa layer over Europe helping to promote the observed and modelled summer-time 2018 enhancements. However, between approximately 50°N and 60°N, the 2017 O<sub>3</sub>WBT values tend to be slightly larger (e.g. by 3.0-5.0 ppbv in places), which will partially offset the southern North Atlantic signal.

To investigate the vertical extent of the profiles, we plot time-pressure profiles for each year of the trajectories released at both sites and altitudes (**Figure S16-S19**). The trajectories are grouped by locations originating north and south of the release points to add some spatial context (e.g. are they

from the southern North Atlantic or northern North Atlantic). When initialised from Paris at the surface (**Figure S16**), the majority of the trajectories originated north of the release point in both 2017 and 2018. Trajectories originating south of the site have an average O<sub>3</sub>WBT value of 41.7 ppbv and 42.1 ppbv in 2017 and 2018. Therefore, there is little difference between them and are all constrained to the troposphere (peak trajectories originate from approximately 500 hPa). For sites originating north of the release point, the sample sizes are larger with similar average O<sub>3</sub>WBT values of 39.4 ppbv and 39.6 ppbv between years. Though, there is a larger vertical distribution in the trajectories with more originating from the mid-troposphere (600-400 hPa). When initialised from Berlin, at the surface (**Figure S17**), the trajectories originating from the south are less frequent but do show a larger flux of O<sub>3</sub> towards the release site in 2017 than 2018 with O<sub>3</sub>WBT values of 40.7 ppbv and 37.4 ppbv. North of the release point, again there are many more trajectories. Here, the vertical distribution for both years is consistent with that of Paris (**Figure S16**) and have average O<sub>3</sub>WBT values of 39.5 ppbv and 38.3 ppbv. Therefore, this is generally supportive that advection of O<sub>3</sub>-rich air into continental Europe was larger in the summer of 2017 than 2018.

When released at 500 hPa, for both release points, the advection of O<sub>3</sub>-rich air was more substantial in 2018. For Paris (**Figure S18**), the average O<sub>3</sub>WBT values, for trajectories originating south of the release point, were 57.3 ppbv and 59.8 ppbv for both years. North of the release site, this was 70.9 ppbv and 75.9 ppbv for 2017 and 2018. For Berlin (**Figure S19**), the corresponding average O<sub>3</sub>WBT values (south of release point) were 55.0 ppbv and 59.3 ppbv in 2017 and 2018 and (north of release point) was 73.4 ppbv in both years. Vertically, for both release points and years, trajectories south of the release points range from the surface (50.0-65.0 ppbv) and 300 hPa (60.0-75.0 ppbv). North of the release points, the trajectories are more constrained to the lower troposphere (800-600 hPa with O<sub>3</sub>WBT values of 50.0-70.0 ppbv) and upper troposphere 350-250 hPa (O<sub>3</sub>WBT >80.0 ppbv). Here, the bulk of the trajectories, before converging on 500 hPa by Day 0, are between 400 and 250 hPa with larger O<sub>3</sub>WBT values (70->80.0 ppbv). Therefore, trajectories originating south of the release point are representative of tropospheric O<sub>3</sub>, while north of the release point (where the tropopause is lower in altitude) the trajectories are exposed to O<sub>3</sub>-rich airmasses originating from the lower stratosphere. Overall, though, advection of O<sub>3</sub>-rich air into continental Europe is more pronounced in 2018 over 2017 at the 500 hPa level. Based on the spatial maps (Figures S14-S15 and Figure 12 of the main manuscript, this 2018 O<sub>3</sub> enhancement is predominantly originating from tropospheric sources in the southern North Atlantic.

## References

- Best, M.J., Pryor, M., Clark, D.B., et al.: The Joint UK Land Environment Simulator (JULES), model description—Part 1: energy and water fluxes, *Geoscientific Model Development*, 4, 677–699, doi: 10.5194/gmd-4-677-2011, 2011.
- Clark, D. B., Mercado, L.M., Sitch, S., et al.: The Joint UK Land Environment Simulator (JULES), model description—Part 2: carbon fluxes and vegetation dynamics, *Geoscientific Model Development*, 4, 701–722, doi: doi.org/10.5194/gmd-4-701-2011, 2011.
- Methven, J., Arnold, S.R., O'Connor, F.M., et al.: Estimating photochemically produced ozone throughout a domain using flight data and a Lagrangian model, *Journal of Geophysical Research: Atmospheres*, **10** (D9), doi:10.1029/2002JD002955, 2003.
- Pacifico, F., Harrison, S.P., Jones, C.D., et al.: Evaluation of a photosynthesis-based biogenic isoprene emission scheme in JULES and simulation of isoprene emissions under present-day climate

conditions, *Atmospheric Chemistry and Physics*, 11, 4371–4389, doi: 10.5194/acp-11-4371-2011, 2011.

Pope, R.J., Butt, E.W., Chipperfield, M.P., et al.: The impact of synoptic weather on UK surface ozone and implications for premature mortality. *Environmental Research Letters*, **11**, 124004, doi:10.1088/1748-9326/11/12/124004, 2016.

Pope, R.J., Arnold, S.R., Chipperfield, M.P., et al.: Substantial Increases in Eastern Amazon and Cerrado Biomass Burning-Sourced Tropospheric Ozone. *Geophysical Research Letters*, 47 (3), e2019GL084143, doi: 10.1029/2019GL084143, 2020.

Pope, R. J., Kerridge, B. J., Siddans, R., et al.: Large enhancements in southern hemisphere satellite-observed trace gases due to the 2019/2020 Australian wildfires, *Journal of Geophysical Research: Atmospheres*, 1–13, doi:10.1029/2021jd034892, 2021.

Zhang, Z., Xue, Y., MacDonald, G., et al.: Investigation of North American vegetation variability under recent climate: A study using the SSiB4/TRIFFID biophysical/dynamic vegetation model, *Journal of Geophysical Research: Atmospheres*, 120: 1300– 1321. doi: 10.1002/2014JD021963, 2015.

293    **Figures:**

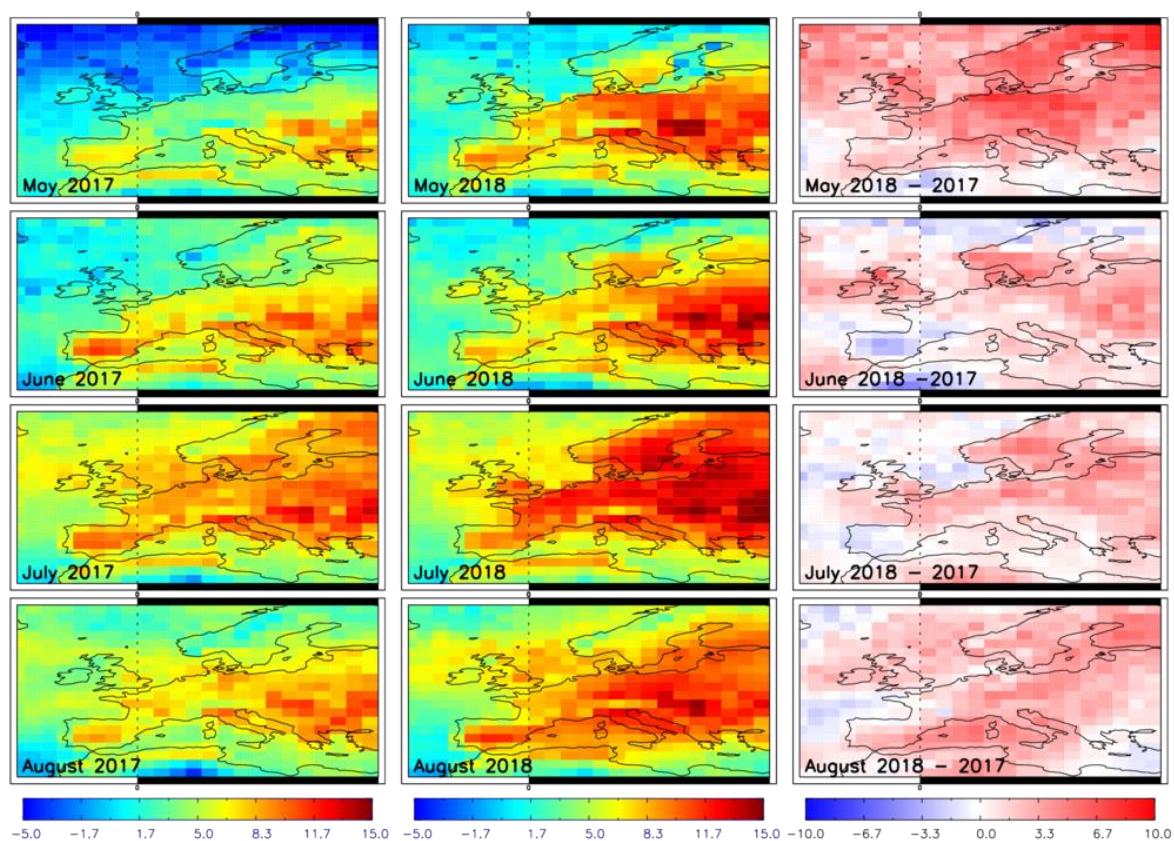

**Figure S1:** Total column methanol retrieved from Metop-A by the extended IMS scheme (CH<sub>3</sub>OH,  $\times 10^{15}$  molecules/cm<sup>2</sup>) for May to August in 2017 (LHS), 2018 (middle) and 2018-2017 difference (RHS) over Europe.



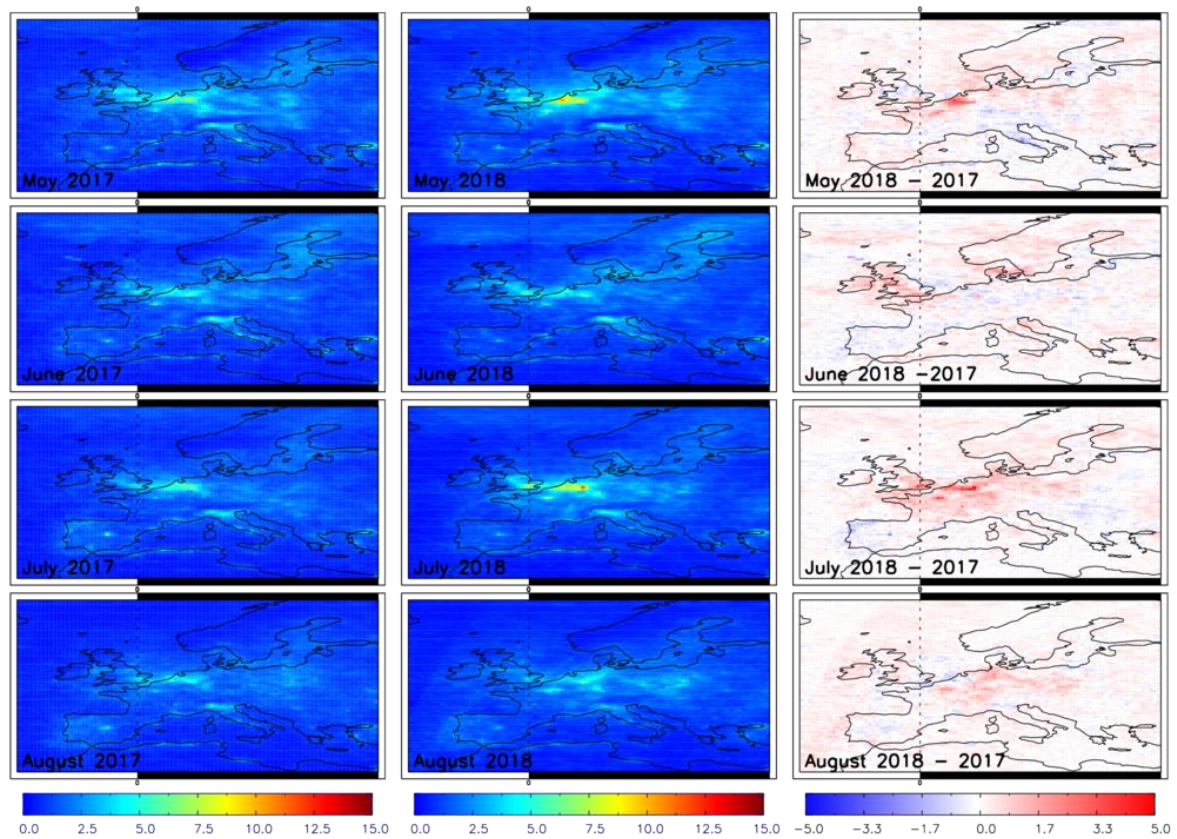

**Figure S2:** GOME-2 tropospheric column nitrogen dioxide ( $\text{NO}_2$ ,  $\times 10^{15}$  molecules/ $\text{cm}^2$ ) for May to August in 2017 (LHS), 2018 (middle) and 2018-2017 difference (RHS) over Europe.

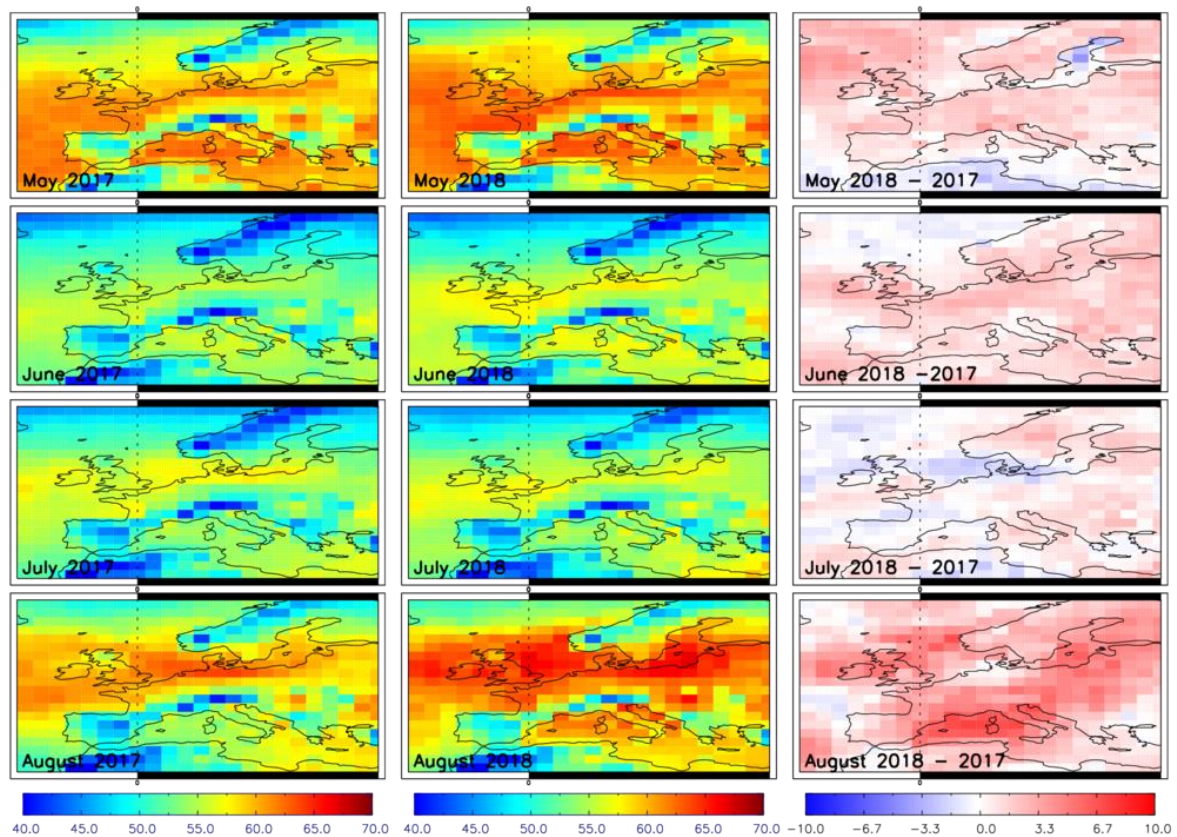

**Figure S3:** Total column carbon monoxide retrieved from MetOp-A by the extended IMS scheme (CO, Dobson units (DU)) for May to August in 2017 (LHS), 2018 (middle) and 2018-2017 difference (RHS) over Europe.

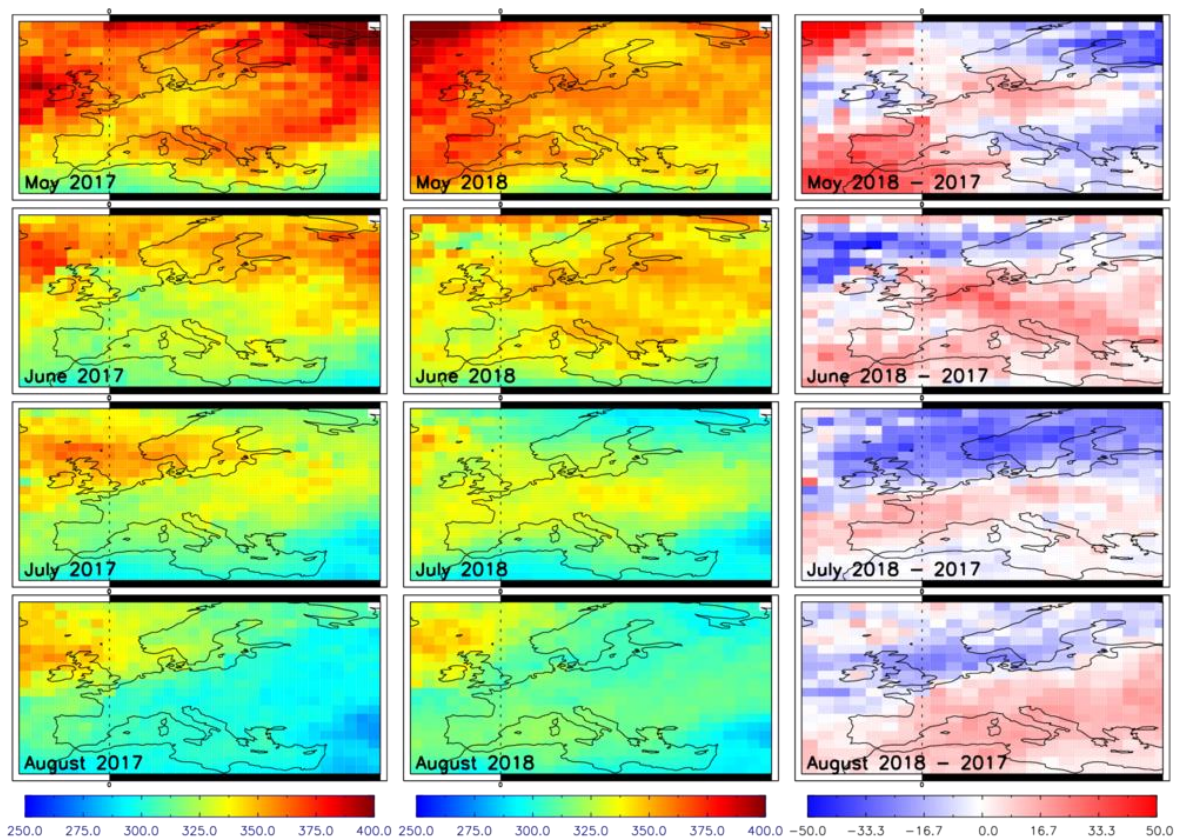

**Figure S4:** GOME-2 total column ozone ( $O_3$ , DU) for May to August in 2017 (LHS), 2018 (middle) and 2018-2017 difference (RHS) over Europe.



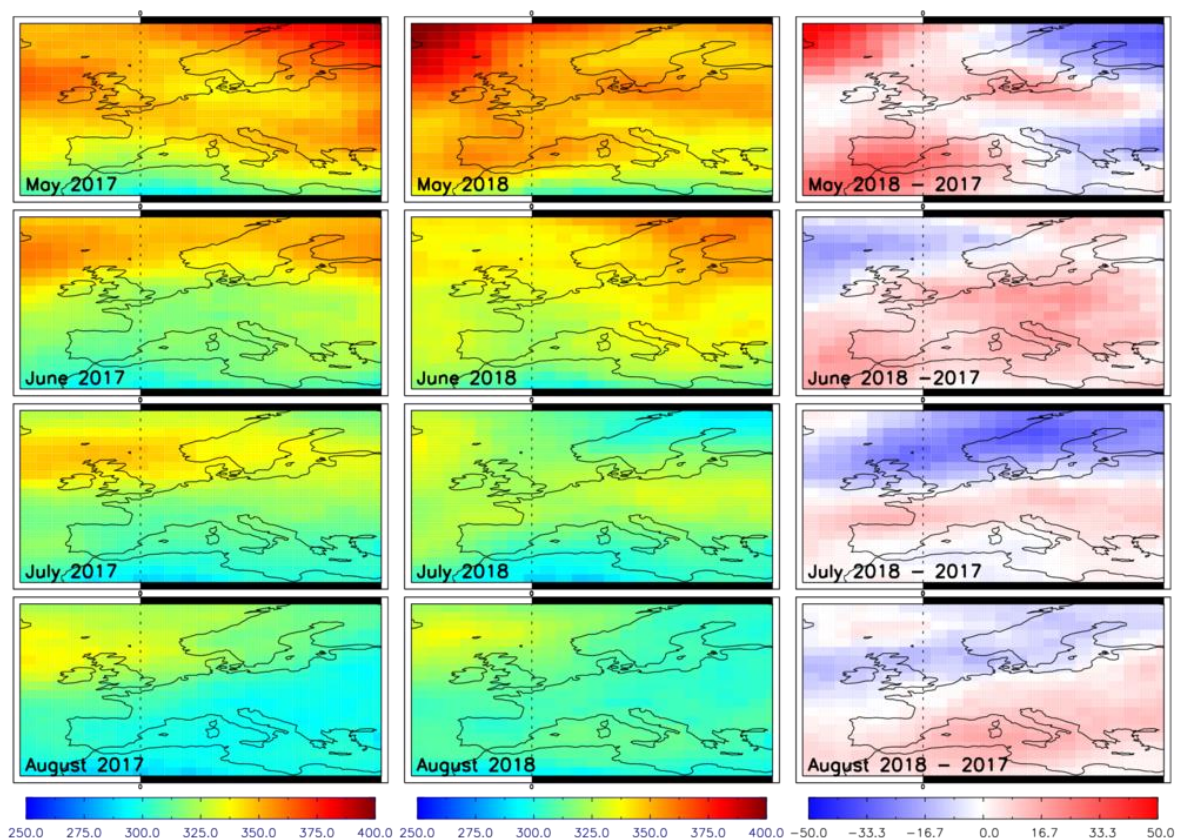

**Figure S5:** Total column  $O_3$  (DU) retrieved from MetOp-A by the extended IMS scheme for May to August in 2017 (LHS), 2018 (middle) and 2018-2017 difference (RHS) over Europe.

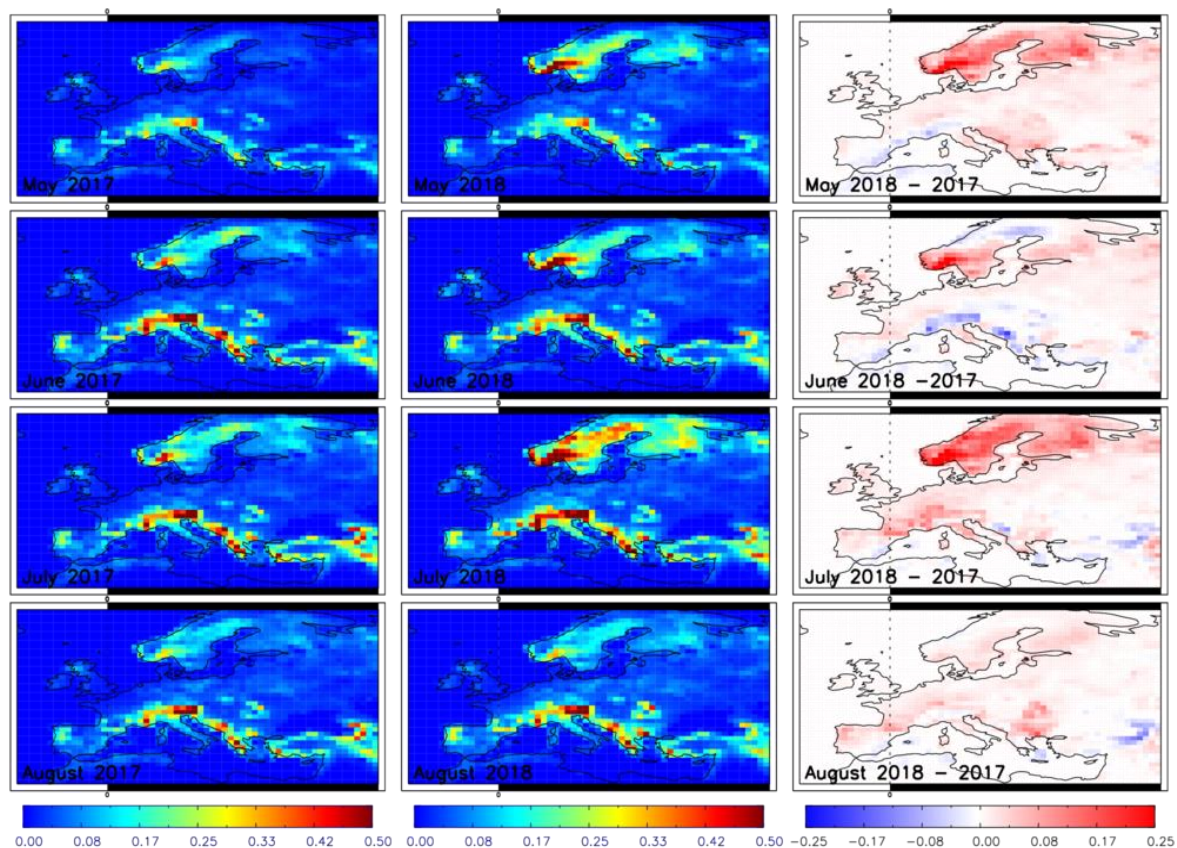

**Figure S6:** JULES biogenic emissions (summation of isoprene, acetone, methanol and monoterpenes in  $\mu\text{g}/\text{m}^2/\text{s}$  of C) for May to August in 2017 (LHS), 2018 (middle) and 2018-2017 difference (RHS) over Europe.

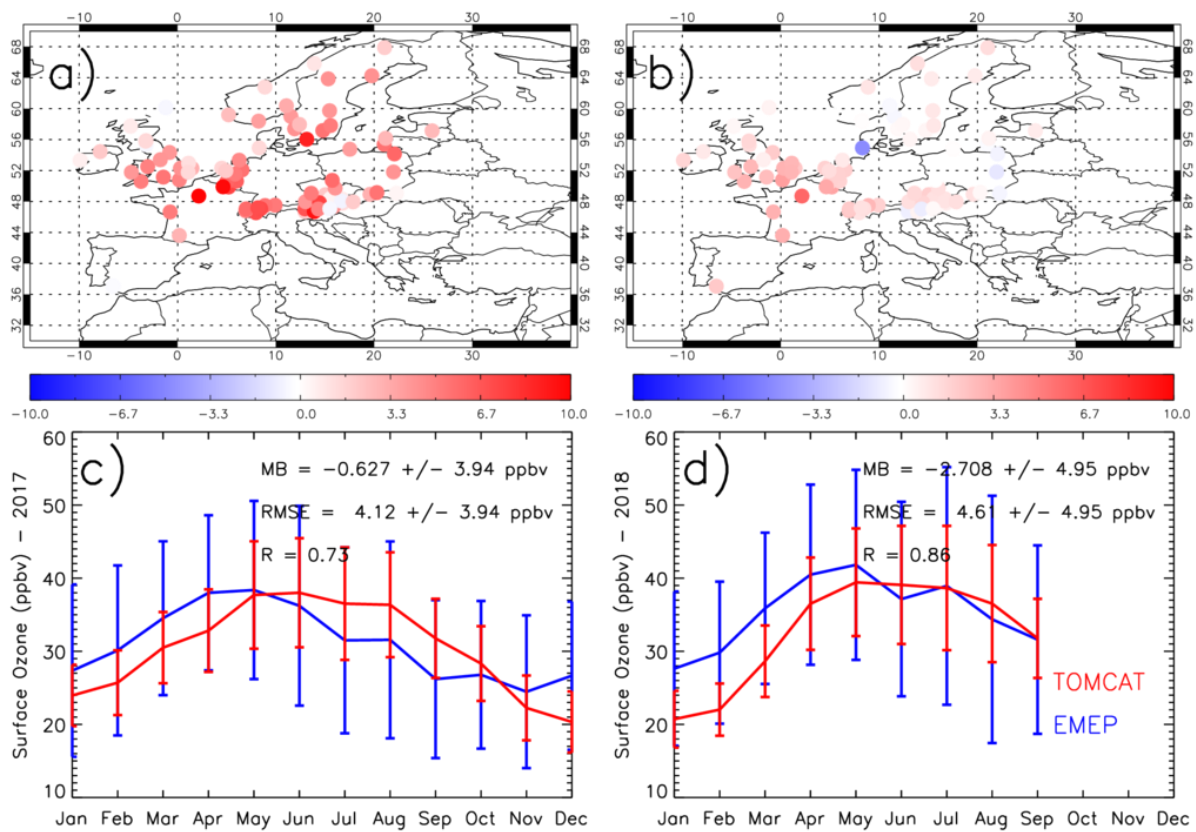

**Figure S7:** Surface  $O_3$  (ppbv) May-June-July-August 2018-2017 average difference for a) EMEP sites and b) TOMCAT. The observational (blue) and modelled (red) surface  $O_3$  seasonal cycle are for c) 2017 and d) 2018. Vertical bars represent the monthly standard deviations. The statistics in the top right of c) and d) are the mean bias (MB), the root mean square error (RMSE) and correlation (R). The uncertainties on the MB and RMSE are the standard errors corrected for temporal autocorrelation.



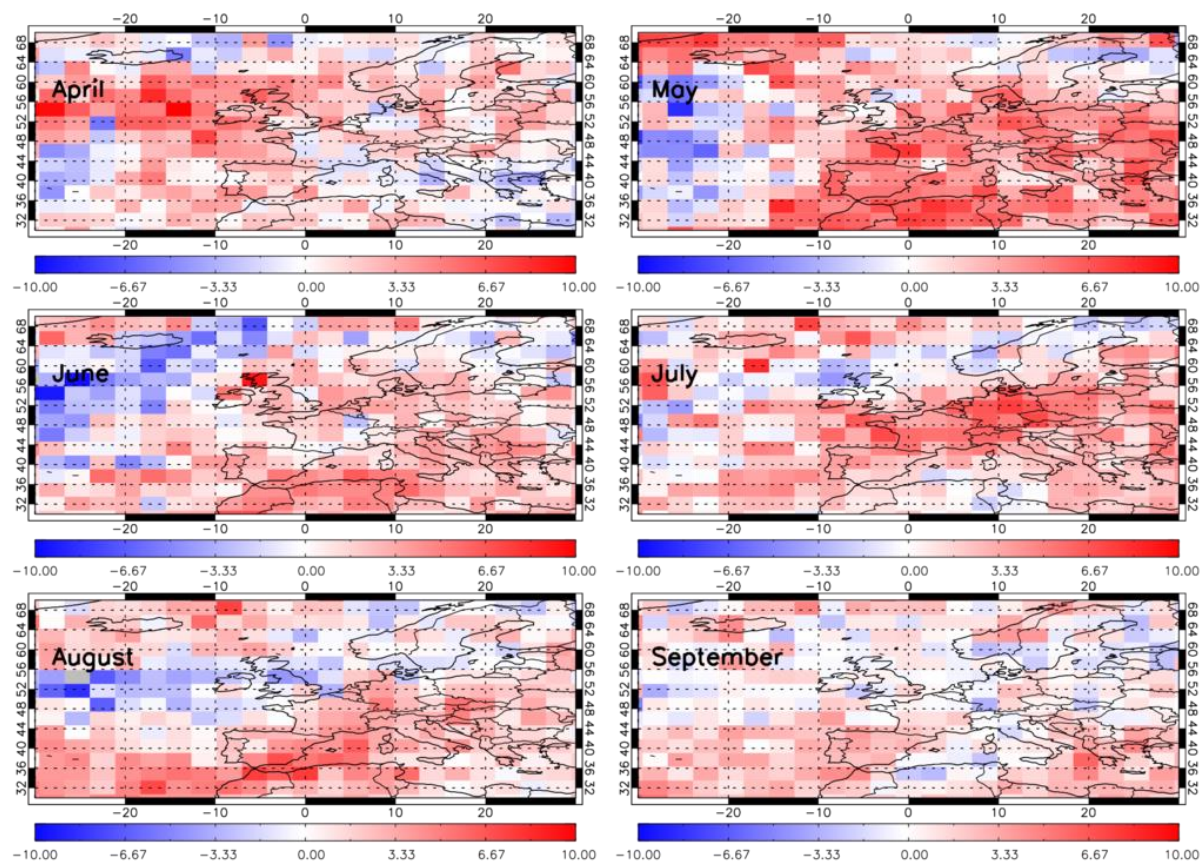

**Figure S8:** Surface-450hPa sub-column ozone (SCO<sub>3</sub>) 2018-2017 differences from GOME-2 for April to September over Europe. SCO<sub>3</sub> units are in Dobson units (DU).

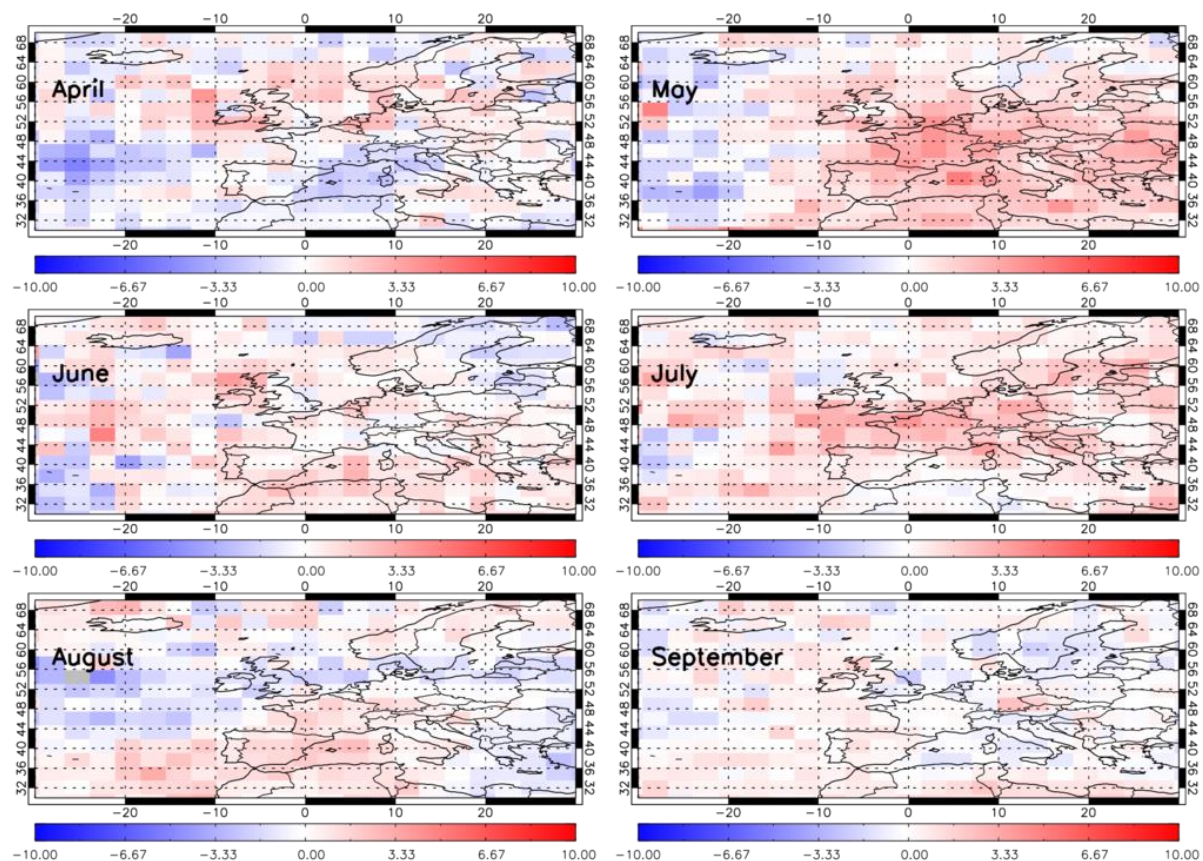

**Figure S9:** Surface-450hPa TOMCAT  $\text{SCO}_3$  (DU), with the GOME-2 averaging kernels (AKs) applied, 2018-2017 differences for April to September over Europe.



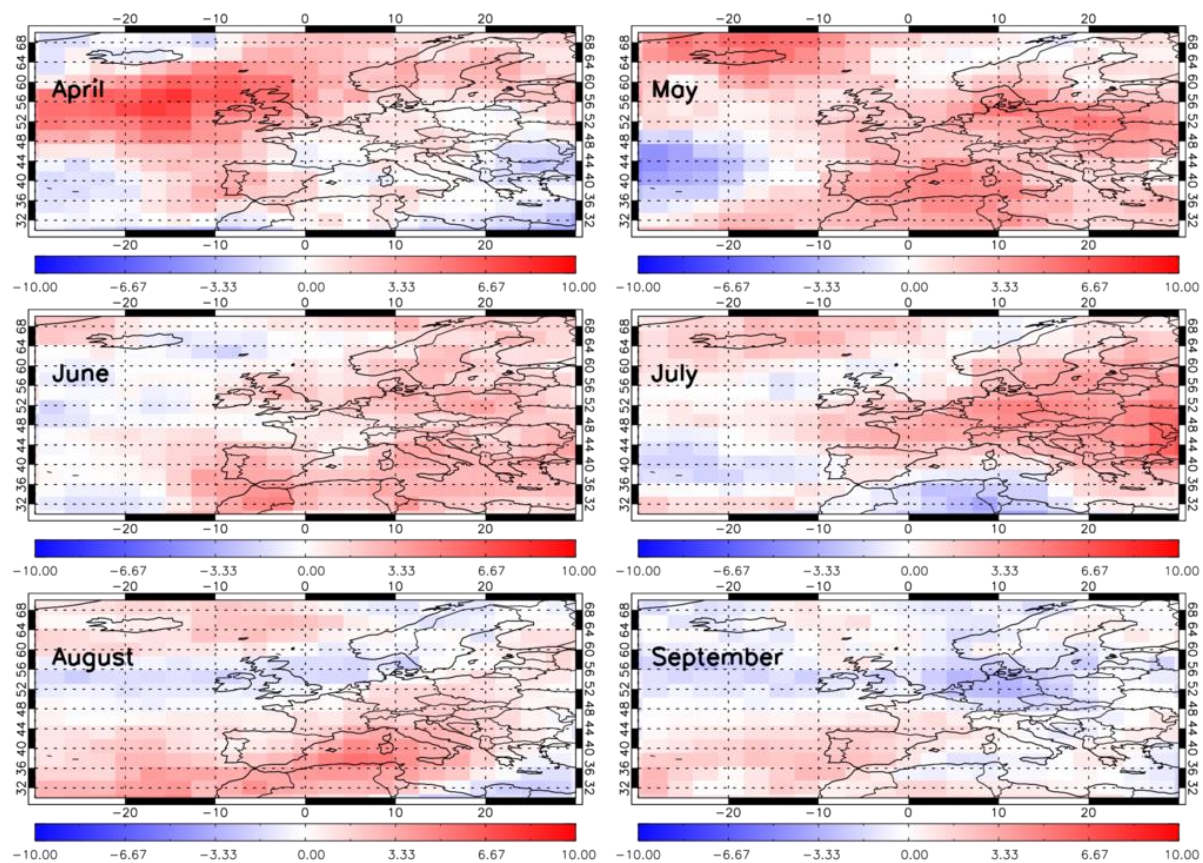

**Figure S10:** Surface-450hPa IMS  $\text{SCO}_3$  (DU) 2018-2017 differences for April to September over Europe.

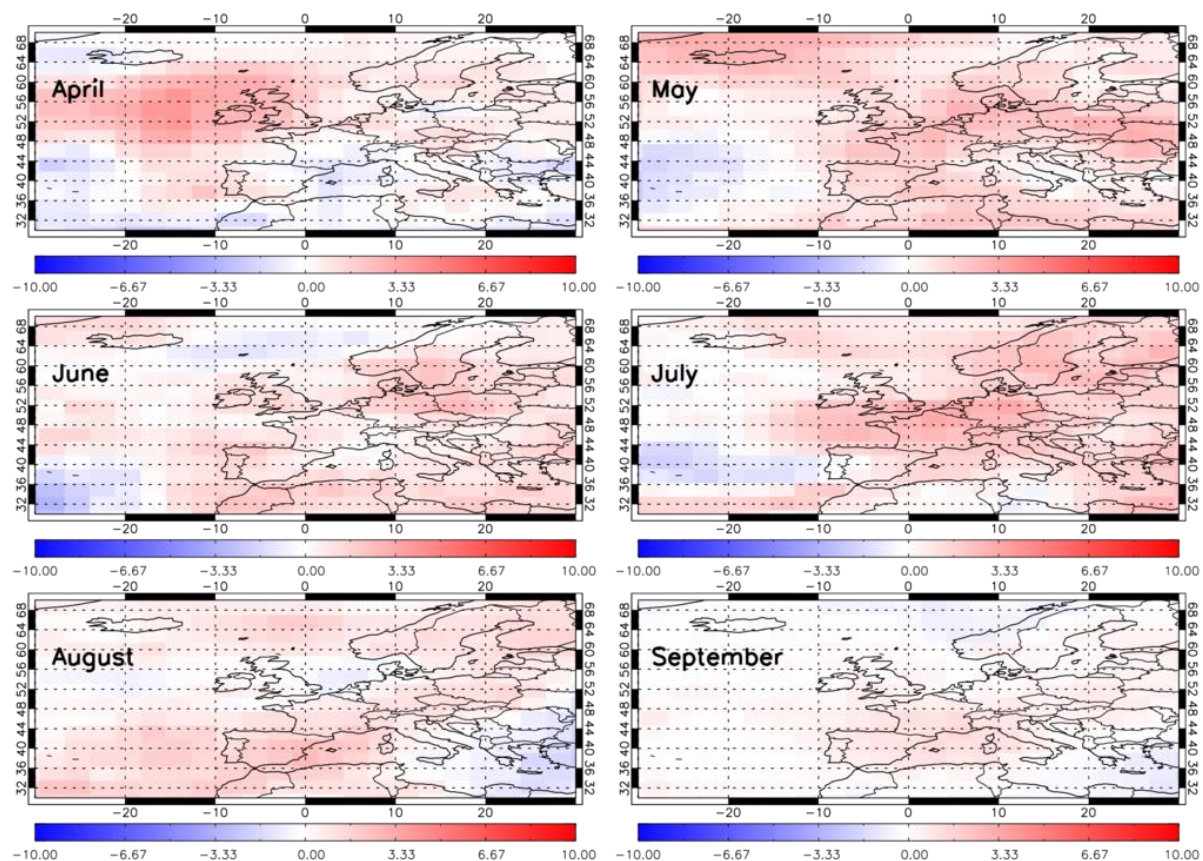

**Figure S11:** Surface-450hPa TOMCAT  $\text{SCO}_3$  (DU), with the IMS averaging kernels (AKs) applied, 2018-2017 differences for April to September over Europe.



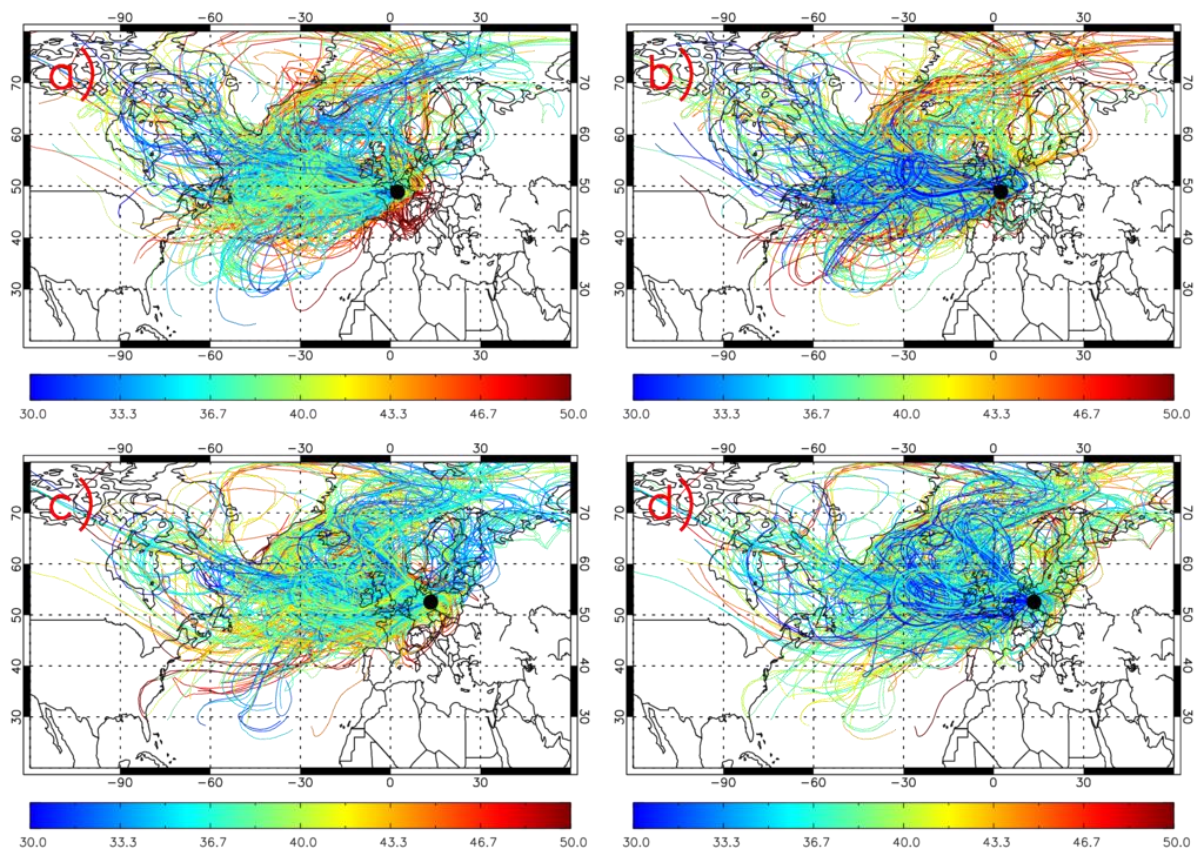

**Figure S12:** ROTRAJ back-trajectories (10 days), weighted by the average TOMCAT  $O_3$  (ppbv) concentration along each trajectory path, for a) Paris at the surface between May and August in 2017, b) Paris at the surface between May and August in 2018, c) Berlin at the surface between May and August in 2017 and d) Berlin at the surface between May and August in 2018. The black circles represent the location of Paris and Berlin where the trajectories were released from.

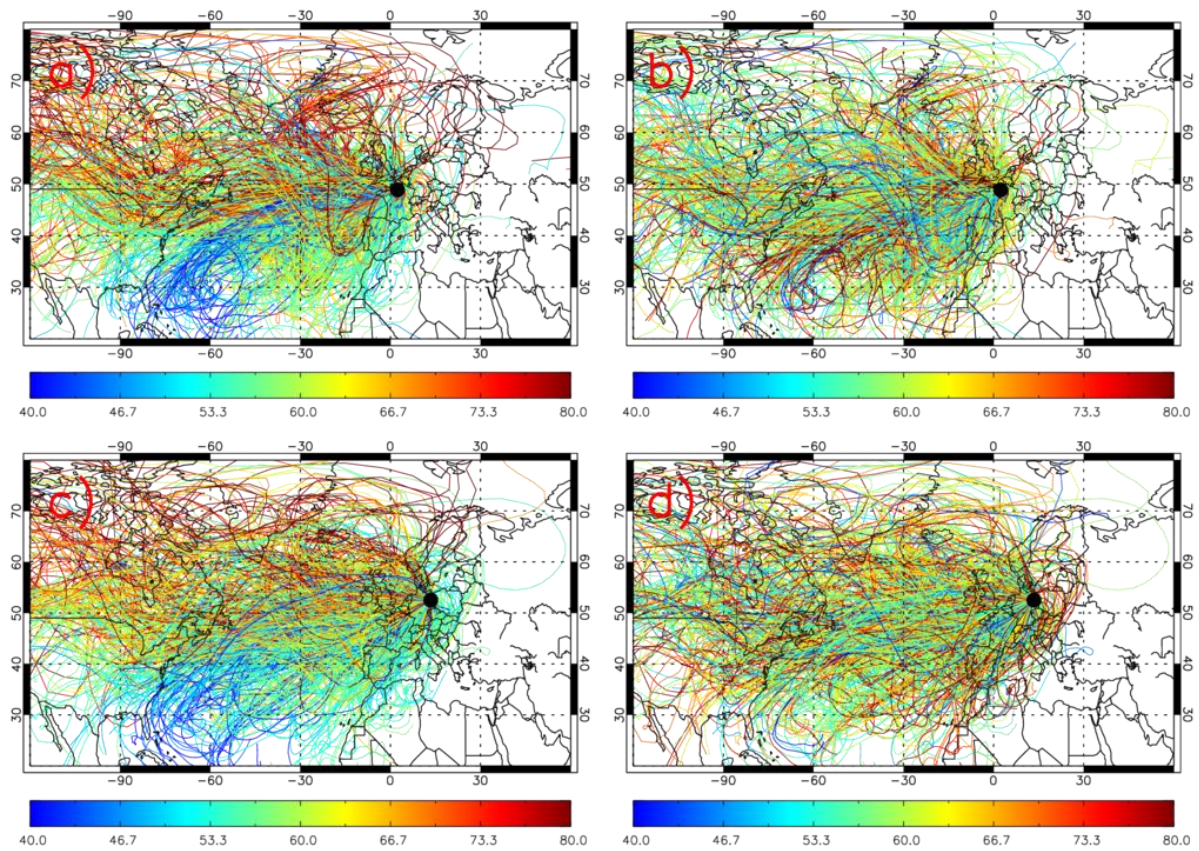

**Figure S13:** ROTRAJ back-trajectories (10 days), weighted by the average TOMCAT  $O_3$  (ppbv) concentration along each trajectory path, for a) Paris at approximately 500 hPa between May and August in 2017, b) Paris at approximately 500 hPa between May and August in 2018, c) Berlin at approximately 500 hPa between May and August in 2017 and d) Berlin at approximately 500 hPa between May and August in 2018. The black circles represent the location of Paris and Berlin where the trajectories were released from.



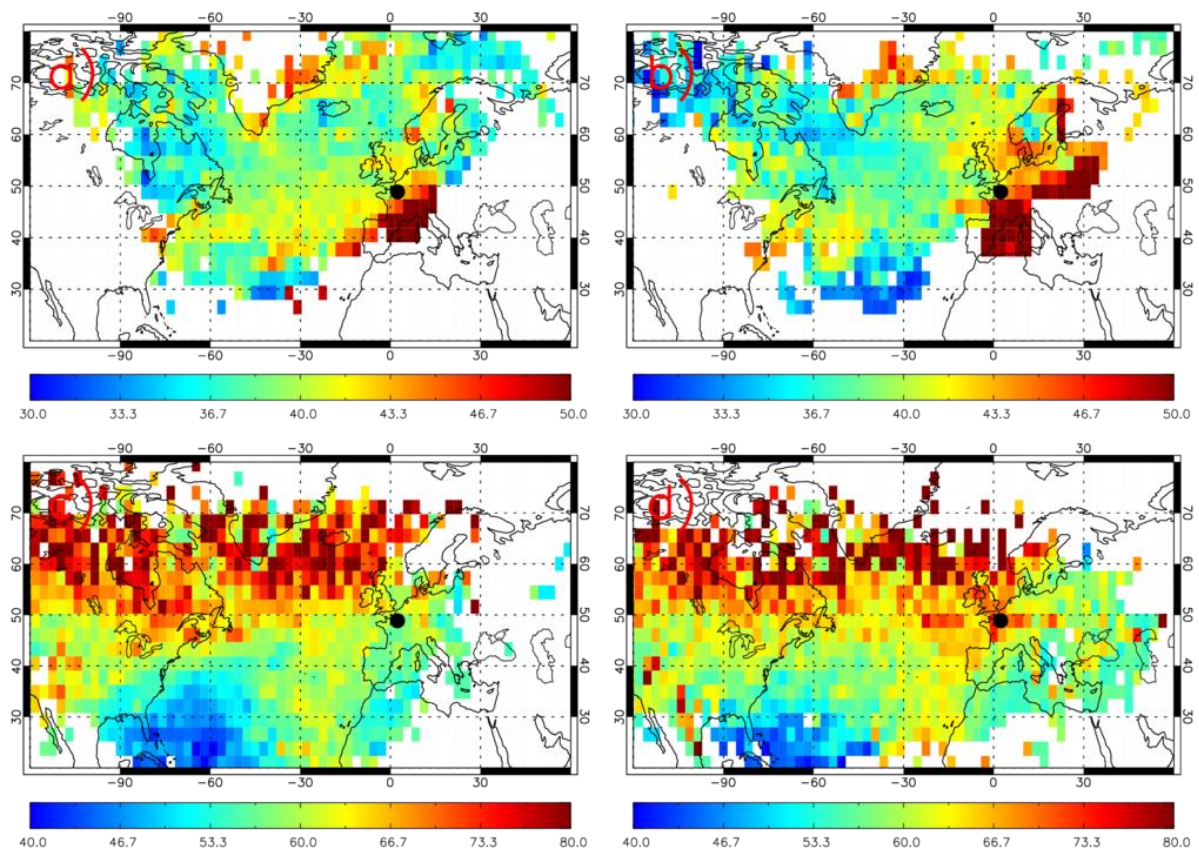

**Figure S14:** ROTRAJ back-trajectories (10 days) released from Paris (May-August), weighted by the average TOMCAT O<sub>3</sub> (ppbv) concentration along each trajectory path, gridded onto the TOMCAT horizontal resolution for a) at the surface in 2017, b) at the surface in 2018, c) at approximately 500 hPa in 2017 and d) at approximately 500 hPa in 2018. The black circles represent the location of Paris where the trajectories were released from.

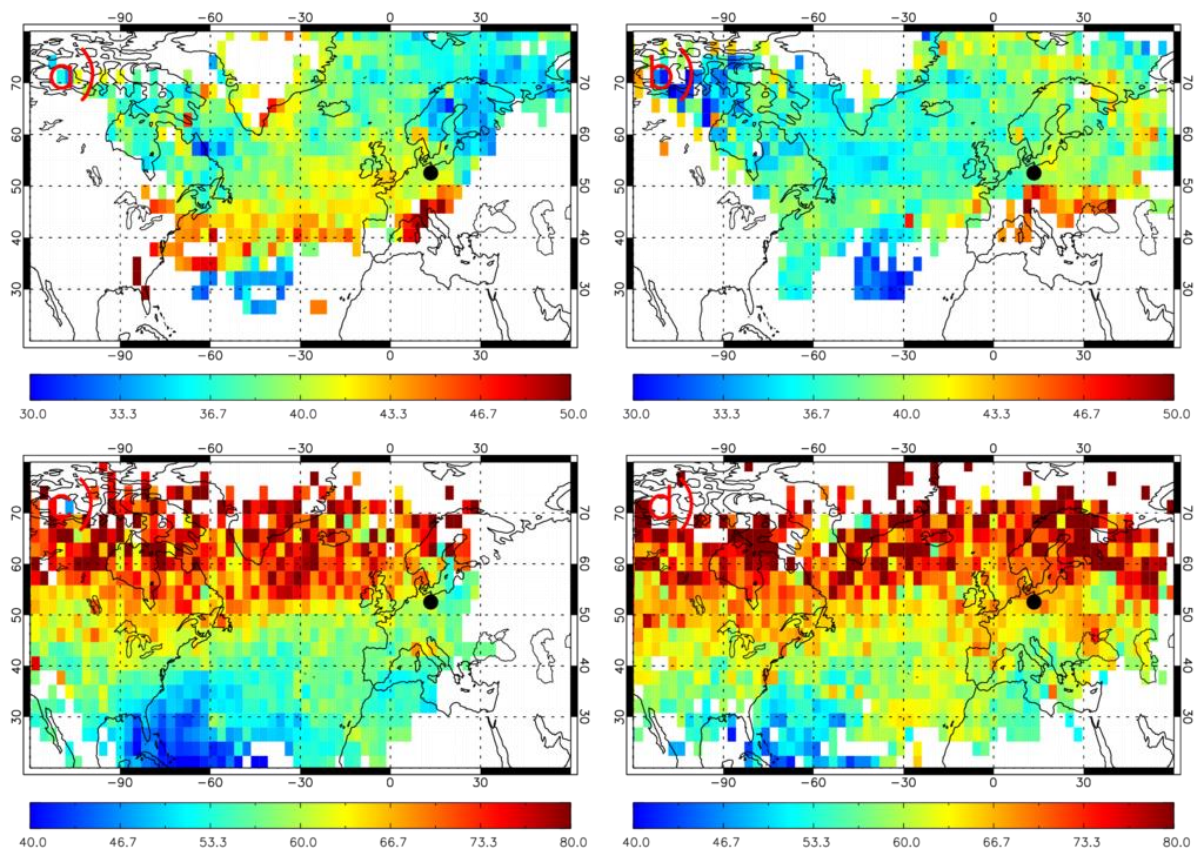

**Figure S15:** ROTRAJ back-trajectories (10 days) released from Berlin (May-August), weighted by the average TOMCAT O<sub>3</sub> (ppbv) concentration along each trajectory path, gridded onto the TOMCAT horizontal resolution for a) at the surface in 2017, b) at the surface in 2018, c) at approximately 500 hPa in 2017 and d) at approximately 500 hPa in 2018. The black circles represent the location of Berlin where the trajectories were released from.

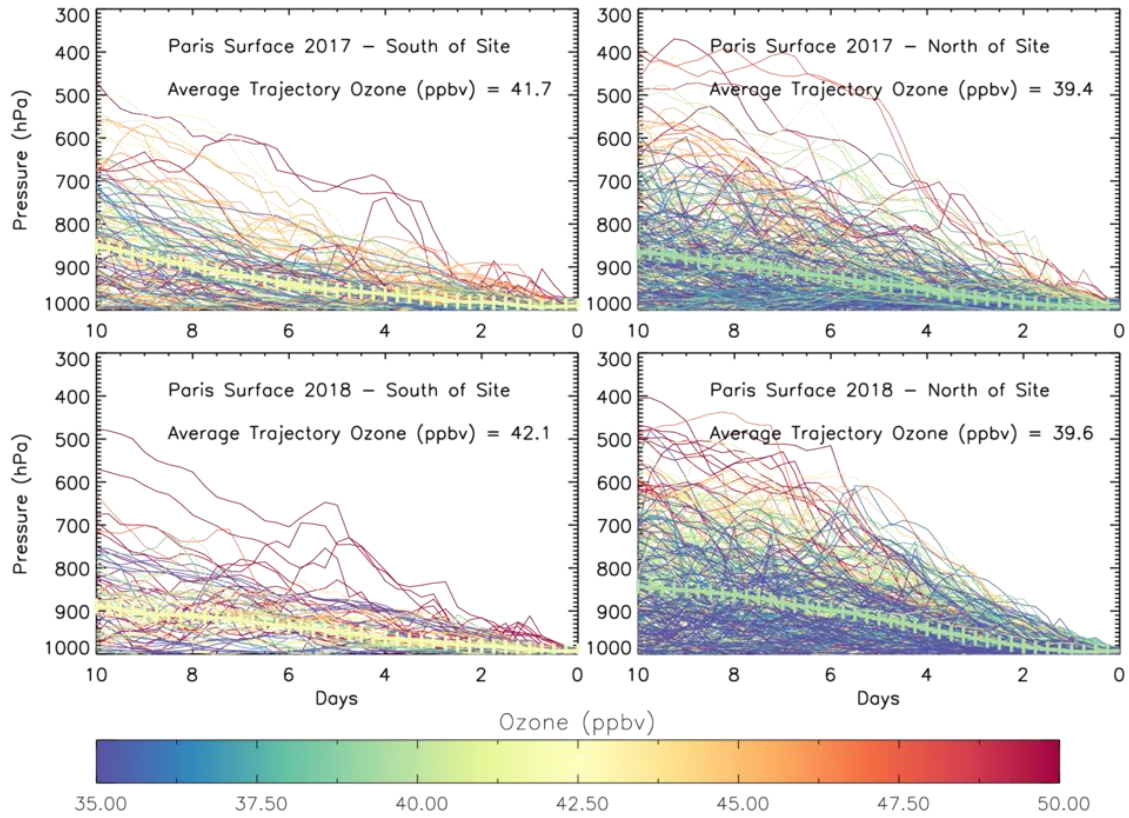

**Figure S16:** ROTRAJ back-trajectories (10 days), weighted by the average TOMCAT  $O_3$  (ppbv) concentration along each trajectory path, plotted as time-pressure profiles, released from Paris near the surface for top-left) 2017 originating south of the release point, top-right) 2017 originating north of the release point, bottom-left) 2018 originating south of the release point and bottom-right) 2018 originating north of the release point. The thick cross lines show the average time-pressure profile coloured by the average weighted TOMCAT  $O_3$  value.



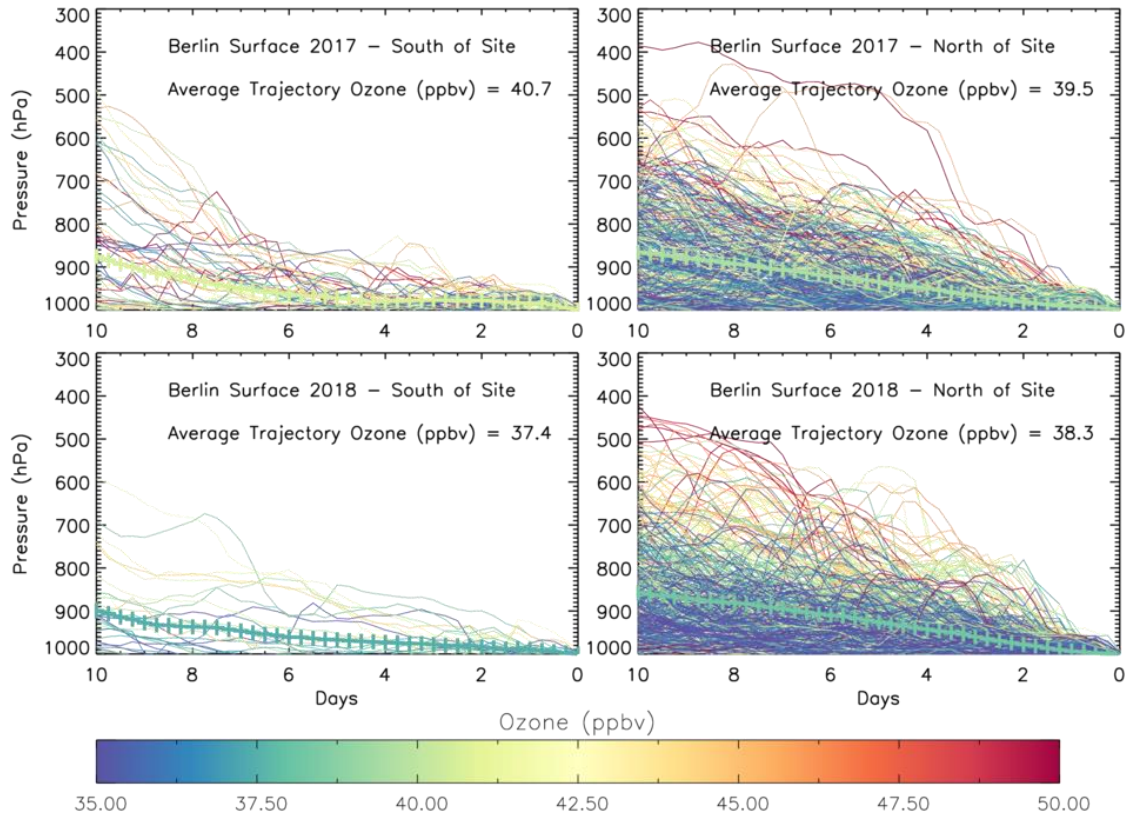

**Figure S17:** ROTRAJ back-trajectories (10 days), weighted by the average TOMCAT  $O_3$  (ppbv) concentration along each trajectory path, plotted as time-pressure profiles, released from Berlin near the surface for top-left) 2017 originating south of the release point, top-right) 2017 originating north of the release point, bottom-left) 2018 originating south of the release point and bottom-right) 2018 originating north of the release point. The thick cross lines show the average time-pressure profile coloured by the average weighted TOMCAT  $O_3$  value.



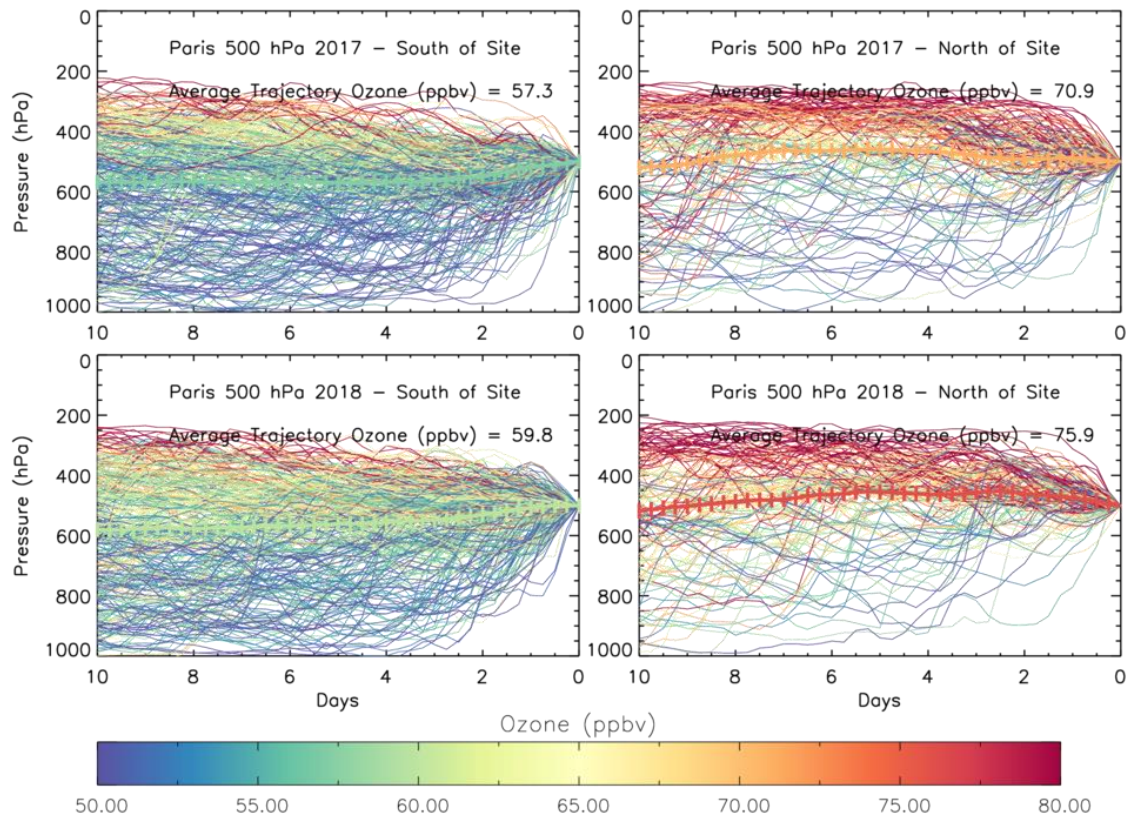

**Figure S18:** ROTRAJ back-trajectories (10 days), weighted by the average TOMCAT  $O_3$  (ppbv) concentration along each trajectory path, plotted as time-pressure profiles, released from Paris at 500 hPa for top-left) 2017 originating south of the release point, top-right) 2017 originating north of the release point, bottom-left) 2018 originating south of the release point and bottom-right) 2018 originating north of the release point. The thick cross lines show the average time-pressure profile coloured by the average weighted TOMCAT  $O_3$  value.

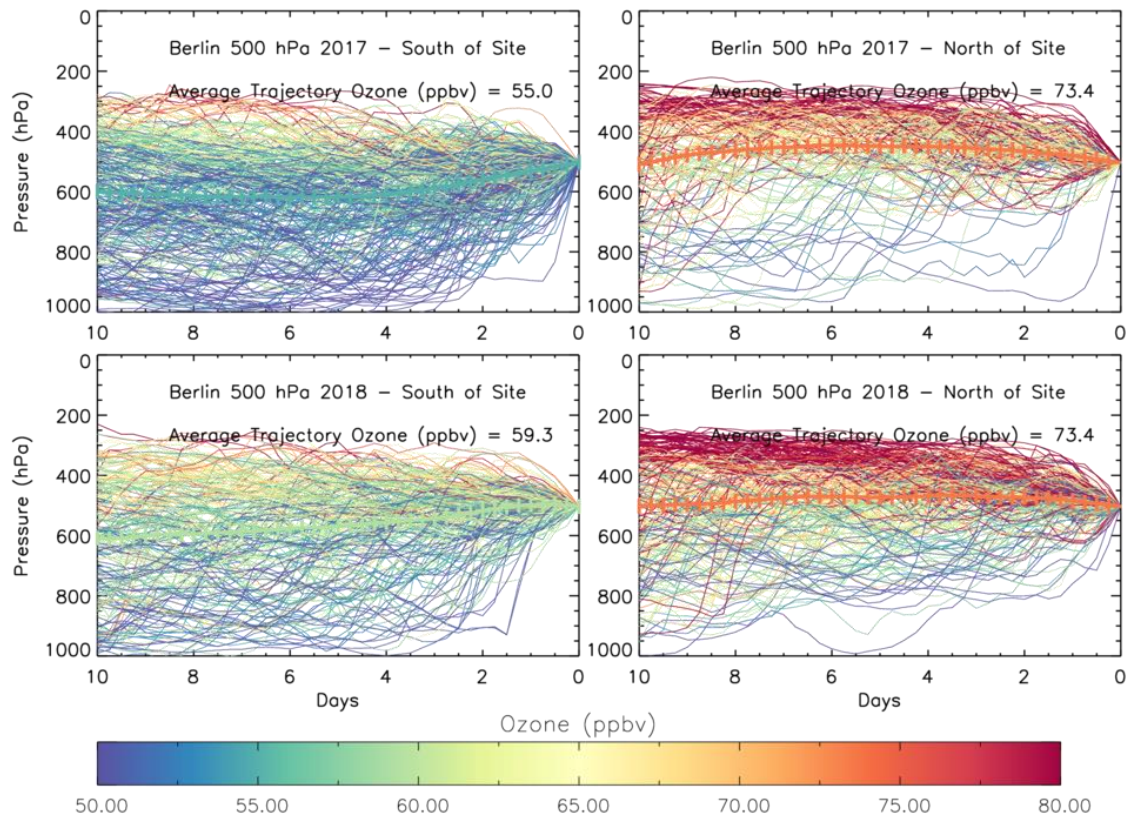

**Figure S19:** ROTRAJ back-trajectories (10 days), weighted by the average TOMCAT  $O_3$  (ppbv) concentration along each trajectory path, plotted as time-pressure profiles, released from Berlin at 500 hPa for top-left) 2017 originating south of the release point, top-right) 2017 originating north of the release point, bottom-left) 2018 originating south of the release point and bottom-right) 2018 originating north of the release point. The thick cross lines show the average time-pressure profile coloured by the average weighted TOMCAT  $O_3$  value.
